# Supplementary material for: Differenzierung von Angststörungen im Elternurteil: Untersuchung anhand des Fragebogens für Angst- und Zwangsstörungen (FBB-ANZ)
Source: Atypon-hosted journal article supplement (doi:10.1024/1422-4917/a000795), 2021-04-09
Supplement: 1422-4917_a000795_esm1.pdf [file 1422-4917_a000795_esm1.pdf]

**ESM 1. Tabelle.** Konfirmatorische Faktorenanalyse: Anpassungsgüte und Fit-Indizes

| Modell                          | $\chi^2$   | <i>df</i> | CFI | TLI | NFI | RSMEA | SRMR |
|---------------------------------|------------|-----------|-----|-----|-----|-------|------|
| 4-Faktoren<br>(imputiert)       | 1937.19*** | 489       | .93 | .92 | .91 | .06   | .00  |
| 4-Faktoren<br>(nicht imputiert) | 1472.23*** | 489       | .94 | .93 | .91 | .05   | .07  |

*Anmerkungen:* CFI = Comparative Fit Index, TLI = Tucker-Lewis Index, NFI = Normed Fit Index, RSMEA = Root Mean Square Residual Error of Approximation, SRMR = Standardized Root Mean Square Residual; \*\*\*  $p < .001$ .
